Title: VASODILATOR THERAPY IN A VASOCONSTRICTOR MODEL OF PULMONARY HYPERTENSION IN SHEEP

Authors: R. C. Prielipp, M.D., R. G. Pearl, M.D. and M. H. Rosenthal, M.D.

Affiliation: Department of Anesthesia, Stanford University Medical Center,  
Stanford, California 94305

**Introduction.** Therapy of pulmonary hypertension with associated right ventricular dysfunction remains a therapeutic problem. Clinical use of vasodilators has produced inconsistent results.<sup>1</sup> Extensive comparative human studies are not feasible. We therefore developed a vasoconstrictor model of pulmonary hypertension in sheep and used this model to compare the vasodilator effects of seven drugs clinically used for therapy of pulmonary hypertension.

**Methods.** Eighteen male sheep weighing 16-30 kg were anesthetized with thiopental, 20 mg/kg iv, intubated and mechanically ventilated to maintain arterial PCO<sub>2</sub> at 35-45 mm Hg. Anesthesia was maintained with halothane (end-tidal 1%) in oxygen. Systemic and pulmonary arterial catheters were inserted. Measured and derived hemodynamic variables included heart rate (HR), cardiac output (CO; by thermodilution), stroke volume (SV), mean systemic arterial (SAP), mean pulmonary arterial (PAP), pulmonary artery wedge, and central venous pressures, pulmonary and systemic vascular resistances (SVR; PVR), arterial and mixed venous blood gas tensions, and shunt fraction (Q<sub>s</sub>/Q<sub>t</sub>). Following baseline measurements, the pulmonary vasoconstrictor U46619, a thromboxane A<sub>2</sub> mimetic, was infused at 0.8-1.7 ug/kg/min. The rate was initially titrated to achieve PAP > 30 mm Hg and a 20% or greater decrease in CO; the infusion rate was then maintained constant. In 9 sheep prostaglandin E<sub>1</sub> (PGE<sub>1</sub>), sodium nitroprusside (SNP), and nitroglycerin (NTG) were then administered in random order with a 45 min stabilization period between drugs. Each drug was titrated to reduce SAP by 30%. Hemodynamic and blood gas data were obtained prior to each drug and 15 min later when a stable infusion rate had been obtained. Following completion of the 3 drug infusions and a 45 min stabilization period, HYD was administered in 3-5 mg boluses to reduce SAP by 30%; final measurements were then obtained. In the other 9 sheep, PGE<sub>1</sub>,

prostaglandin (PGI<sub>2</sub>), isoproterenol (ISO) and nifedipine (NIF) were similarly studied; nifedipine was administered by continuous infusion. Drug effects were assessed by repeated measures analysis of variance and the Newman-Keuls' multiple range test.

**Results.** U46619 increased PAP 128%, PVR, 338%, and the PVR/SVR ratio 138%, and decreased CO 35% (Table). These effects remained stable throughout the study. All drug doses except ISO were limited by the 30% decrease in SAP; ISO dose was limited by tachycardia and dysrhythmias. All 7 drugs decreased PAP, PVR, and SVR. All drugs except NTG and SNP increased CO; SV increased only with PGE<sub>1</sub>, PGI<sub>2</sub>, and NIF. All drugs except PGE<sub>1</sub> and ISO increased the PVR/SVR ratio. With the exception of HYD, all drugs which increased CO increased Q<sub>s</sub>/Q<sub>t</sub>. All drugs which increased CO increased mixed venous PO<sub>2</sub>. Arterial PO<sub>2</sub> increased with HYD, ISO, and NIF and remained unchanged with the other drugs.

**Discussion.** Although all 7 drugs decreased PAP and PVR, distinct hemodynamic profiles were found. As assessed by the PVR/SVR ratio, PGE<sub>1</sub> and ISO demonstrated the greatest pulmonary specificity. PGE<sub>1</sub> resulted in the largest decrease in PAP; ISO resulted in the smallest decrease in SAP and the largest increase in HR. NTG, SNP, and PGI<sub>2</sub> demonstrated intermediate pulmonary specificity. PGI<sub>2</sub> resulted in a large increase in CO while NTG and SNP did not affect CO. NIF and HYD demonstrated the least pulmonary specificity. NIF resulted in the smallest decrease in PAP; HYD resulted in a large decrease in SVR with only a moderate decrease in PVR. The drug hemodynamic profiles in this study are consistent with the limited data on human pulmonary hypertension.<sup>1</sup> The description of unique hemodynamic profiles indicates that rational selection of pulmonary vasodilators will depend upon baseline HR, rhythm, PAP, SAP, and CO.

**Reference.** 1. Packer M. Vasodilator therapy for primary pulmonary hypertension. Ann Intern Med 103:258-270, 1985

| TABLE                | HR<br>(beats/min) | SAP<br>(mm Hg) | PAP<br>(mm Hg) |
|----------------------|-------------------|----------------|----------------|
| Baseline             | 138±10            | 98±5           | 14±1           |
| U46619               | 119±5             | 127±4+         | 31±1+          |
| Pre NTG              | 128±6             | 125±5          | 34±1           |
| NTG                  | 145±8             | 90±4+          | 27±1+          |
| Pre SNP              | 135±8             | 120±3          | 34±1           |
| SNP                  | 147±8             | 83±3+          | 27±1+          |
| Pre HYD              | 138±11            | 108±5          | 34±1           |
| HYD                  | 162±14            | 69±5+          | 28±1+          |
| Pre PGE <sub>1</sub> | 118±5             | 122±4          | 32±1           |
| PGE <sub>1</sub>     | 127±5             | 87±3+          | 22±1+          |
| Pre ISO              | 119±6             | 121±4          | 30±1           |
| ISO                  | 182±10+           | 110±6          | 25±2+          |
| Pre PGI <sub>2</sub> | 118±4             | 118±3          | 30±1           |
| PGI <sub>2</sub>     | 145±8+            | 85±2+          | 25±2*          |
| Pre NIF              | 113±3             | 108±4          | 31±1           |
| NIF                  | 123±9             | 74±3+          | 29±1+          |

Values are means ± SEM for nine sheep;

| CO<br>(L/m) | PVR<br>(d·s·cm <sup>-5</sup> ) | PVR/SVR  | Qs/Qt<br>(%) |
|-------------|--------------------------------|----------|--------------|
| 2.6±0.2     | 266±40                         | .09±.01  | 17±1         |
| 1.7±0.2+    | 1164±171+                      | .21±.01+ | 19±2         |
| 1.5±0.2     | 1467±230                       | .21±.02  | 25±5         |
| 1.6±0.2     | 1182±190*                      | .25±.03* | 27±5         |
| 1.6±0.2     | 1408±270                       | .22±.02  | 24±4         |
| 1.5±0.1     | 1200±209*                      | .26±.02* | 24±3         |
| 1.7±0.2     | 1386±250                       | .25±.03  | 31±5         |
| 2.1±0.3*    | 933±160+                       | .36±.07* | 33±4         |
| 1.6±0.2     | 1345±207                       | .20±.02  | 20±4         |
| 2.2±0.2+    | 740±135+                       | .21±.02  | 28±5+        |
| 1.8±0.1     | 996±90                         | .20±.01  | 18±2         |
| 3.2±0.2+    | 573±55+                        | .20±.02  | 23±2+        |
| 1.7±0.2     | 1085±90                        | .21±.01  | 16±3         |
| 3.1±0.3+    | 570±90+                        | .24±.02* | 23±2+        |
| 1.6±0.1     | 1200±100                       | .23±.02  | 19±4         |
| 2.4±0.3*    | 810±110+                       | .32±.02+ | 25±3*        |

\*p < 0.05 compared to pre-drug value; +p < 0.01
